# Supplementary material for: Tunable ultra-uniform Cs4PbBr6 perovskites with efficient photoluminescence and excellent stability for high-performance white light-emitting diodes
Source: Royal Society of Chemistry journal article supplement (doi:10.1039/d1tc02210e), 2021-01-01
Supplement: d1tc02210e1.pdf [file d1tc02210e1.pdf]

Electronic supplementary information

**Tunable ultra-uniform Cs<sub>4</sub>PbBr<sub>6</sub> perovskites with efficient photoluminescence and excellent stability for high-performance white light-emitting diodes**

Yao Li,<sup>ab</sup> Kaimin Du,<sup>ab</sup> Manli Zhang,<sup>ab</sup> Xuan Gao,<sup>ab</sup> Yu Lu,<sup>a</sup> Shuang Yao,<sup>a</sup> Chengyu Li,<sup>ab</sup> Jing Feng<sup>\*ab</sup> and Hongjie Zhang<sup>\*abcd</sup>

<sup>a</sup> *State Key Laboratory of Rare Earth Resource Utilization, Changchun Institute of Applied Chemistry, Chinese Academy of Science, 5625 Renmin Street, Changchun 130022, China.*

<sup>b</sup> *University of Science and Technology of China, Hefei 230026, China*

<sup>c</sup> *Department of Chemistry, Tsinghua University, Beijing 100084, China*

<sup>d</sup> *Guangdong Guangna Huiming Technology Limited Company, The GBA National Institute for Nanotechnology Innovation, Guangzhou, China*

*\* Corresponding authors. Tel.: +86 431 85262127; fax: +86 431 85698041.*

*E-mail addresses: fengj@ciac.ac.cn (J. Feng), hongjie@ciac.ac.cn (H. Zhang).*

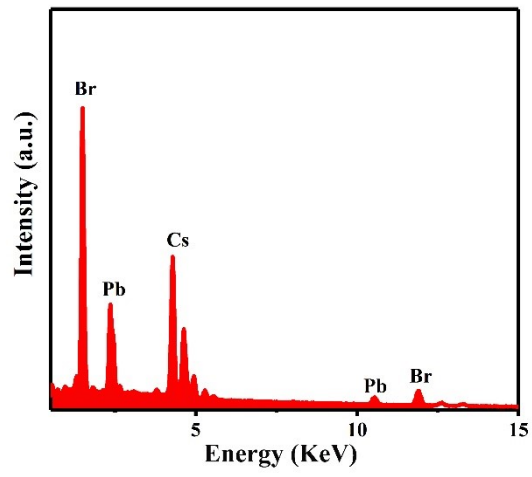

**Fig. S1** Energy-dispersive X-ray (EDX) spectrum of Cs<sub>4</sub>PbBr<sub>6</sub> MCs.

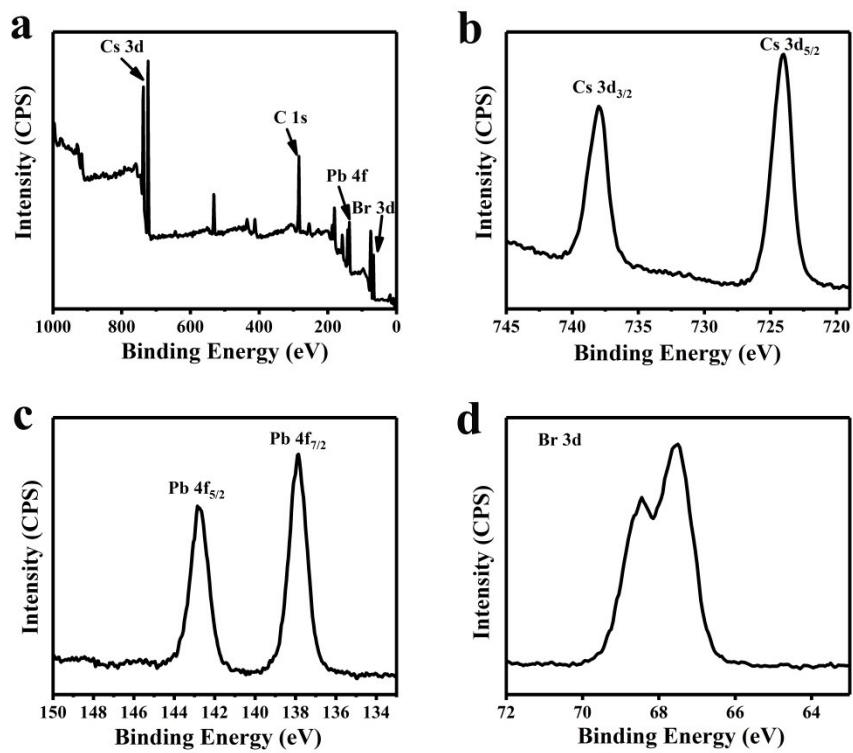

**Fig. S2** X-ray photoelectron spectroscopy (XPS) of  $\text{Cs}_4\text{PbBr}_6$ : (a) survey, (b) Cs 3d, (c) Pb 4f, and (d) Br 3d.

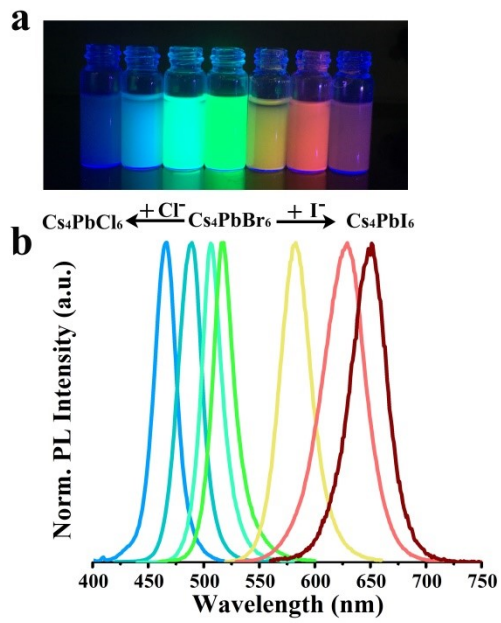

**Fig. S3** (a) Photographs of  $\text{Cs}_4\text{PbX}_6$  ( $X = \text{Cl}, \text{Br}, \text{I}$ , or their mixture) cyclohexane dispersion solution under UV light irradiation ( $\lambda = 365 \text{ nm}$ ). (b) PL spectra of  $\text{Cs}_4\text{PbX}_6$  ( $X = \text{Cl}, \text{Br}, \text{I}$ , or their mixture).

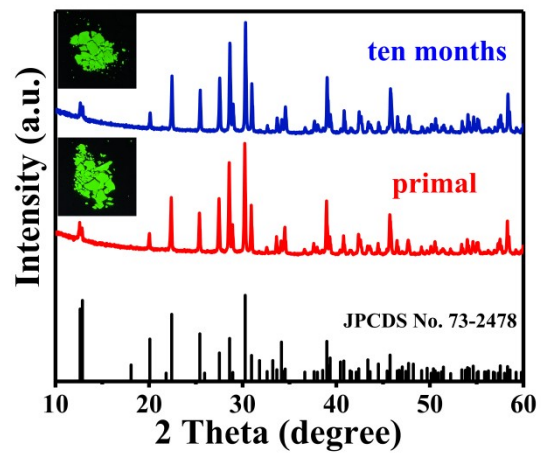

**Fig. S4** XRD patterns of Cs<sub>4</sub>PbBr<sub>6</sub> tested at different time (red line: primal Cs<sub>4</sub>PbBr<sub>6</sub>; blue line: Cs<sub>4</sub>PbBr<sub>6</sub> storages for 10 months). The insets show the photoluminescence photographs of corresponding samples excited at 365 nm.

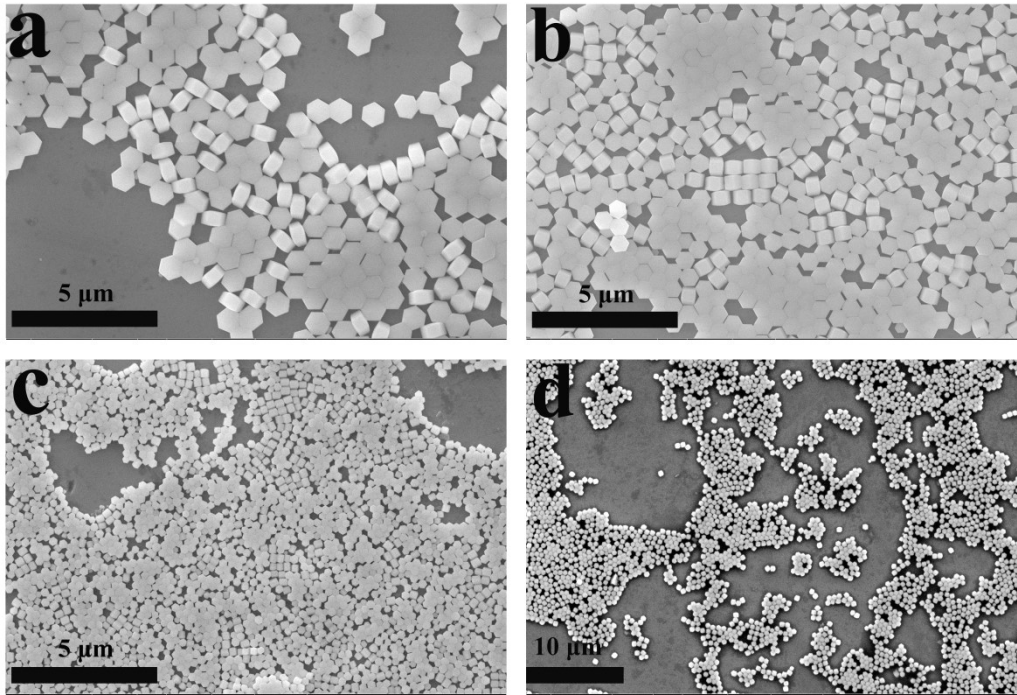

**Fig. S5** Low magnification SEM images of Cs<sub>4</sub>PbBr<sub>6</sub> MCs.

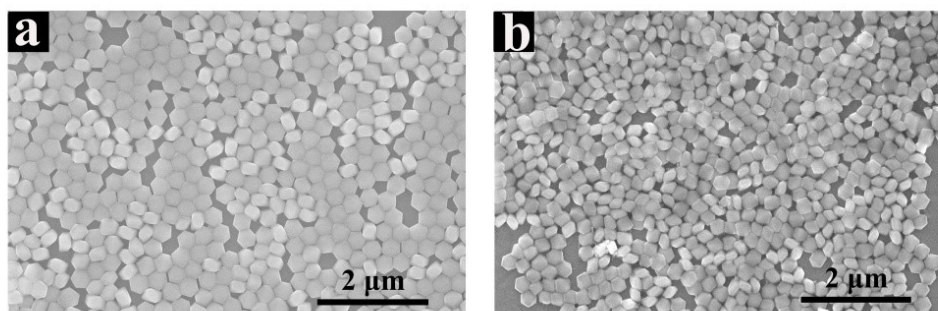

**Fig. S6** SEM images of  $\text{Cs}_4\text{PbBr}_6$  samples synthesized with Cs:Pb ratios of (a) 1.33:1.5 and (b) 1.33:1.75.

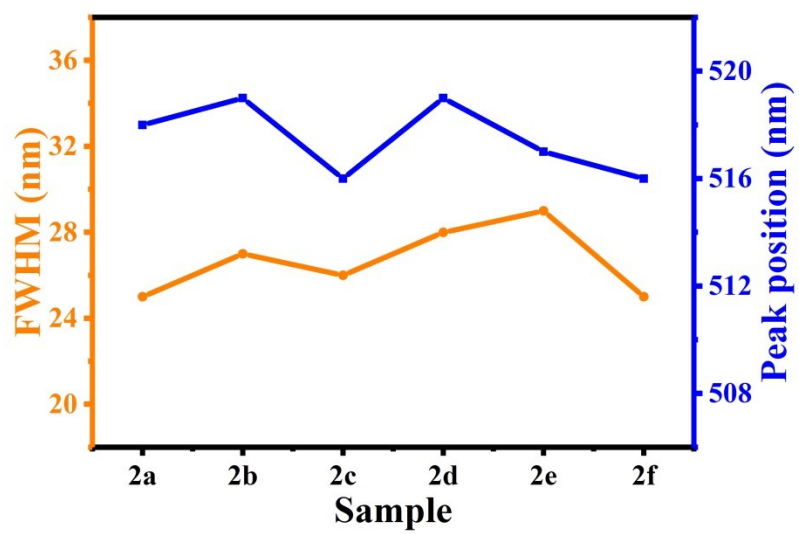

Fig. S7 PL peak position and FWHM of samples 2a-2f.



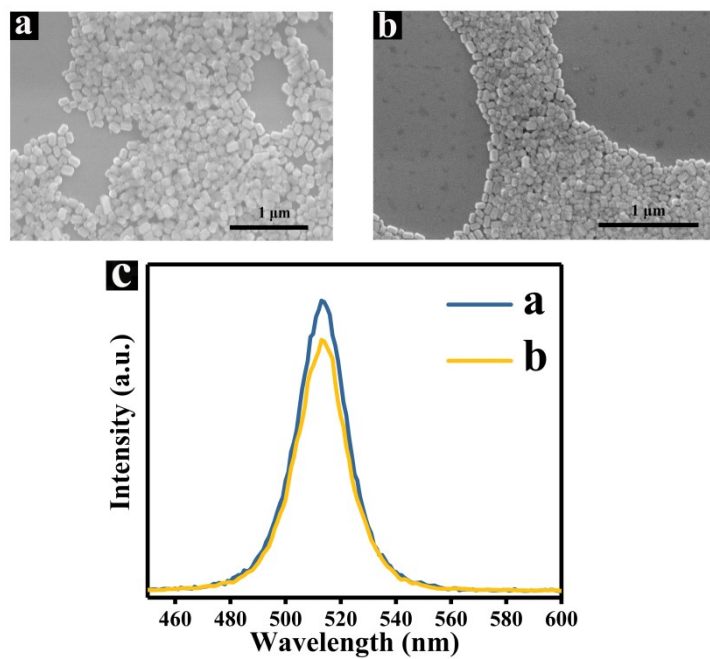

**Fig. S8** SEM images of Cs<sub>4</sub>PbBr<sub>6</sub> samples synthesized with oleic acid:n-octylamine (μL) ratios of (a) 600:160 and (b) 200:80. (c) PL spectra of samples a and b.

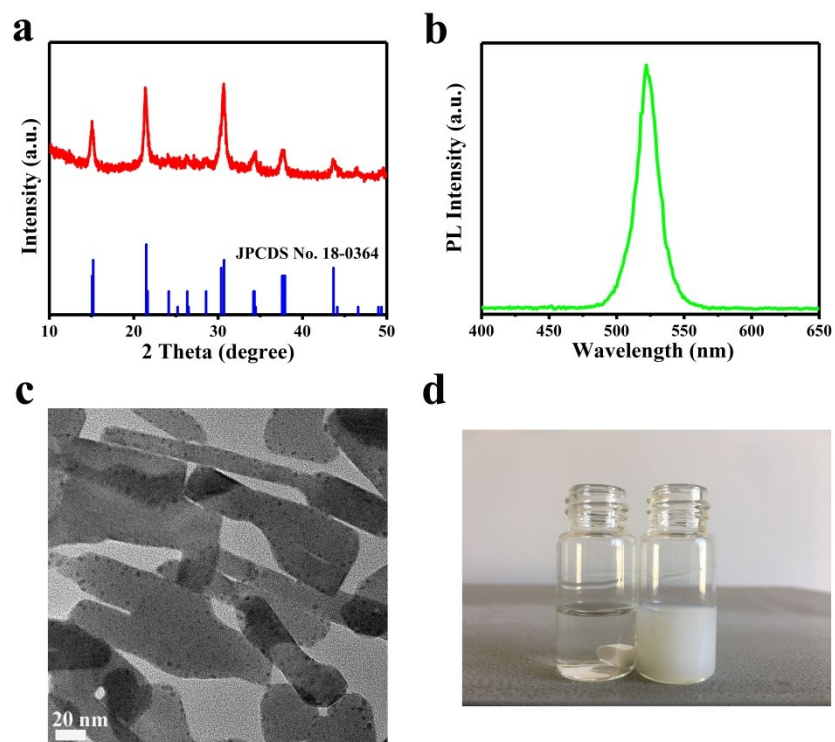

**Fig. S9** (a) XRD pattern of CsPbBr<sub>3</sub>. (b) PL spectrum of CsPbBr<sub>3</sub>. (c) TEM image of CsPbBr<sub>3</sub> perovskites. (d) Photograph of the 'oil phase' solution with same n-octylamine content (80 μL) and different oleic acid content: 600 μL (left) and 1.2 mL (right).

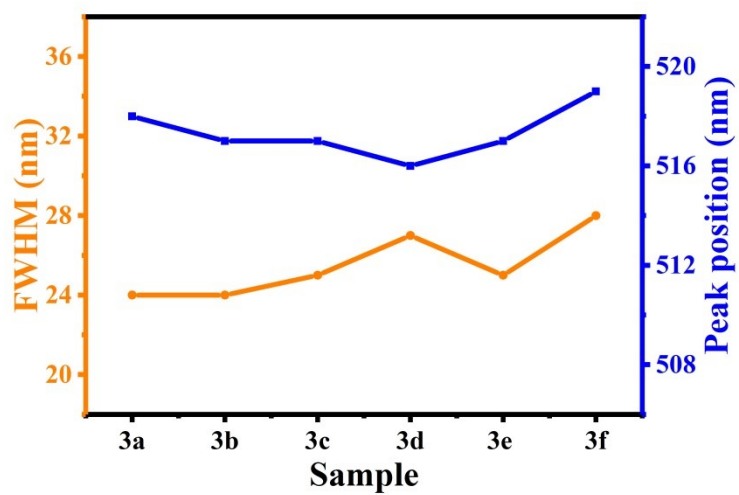

Fig. S10 PL peak position and FWHM of samples 3a-3f.

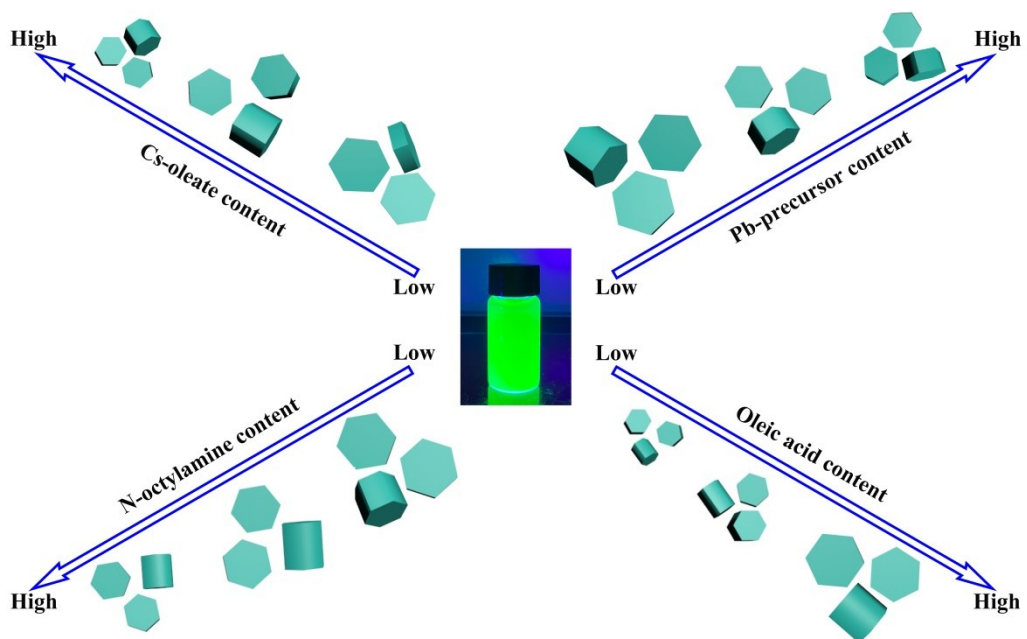

**Fig. S11** Summary of the shape and size of  $\text{Cs}_4\text{PbBr}_6$  MCs dependence on the content of Cs-oleate, Pb-precursor, n-octylamine and oleic acid.

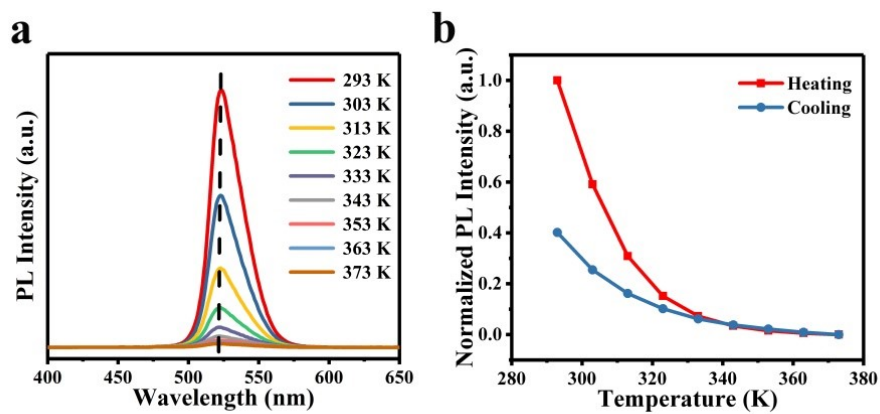

**Fig. S12** (a) PL spectra of CsPbBr<sub>3</sub> from 293 to 373 K. (b) Plots of normalized PL intensity of CsPbBr<sub>3</sub> with the thermal cycling testing in the temperature range of 293 to 373 K.

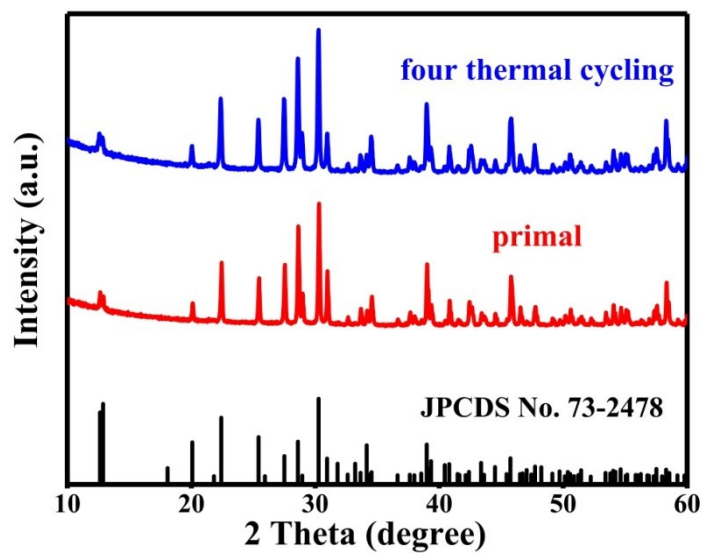

**Fig. S13** XRD patterns of Cs<sub>4</sub>PbBr<sub>6</sub> tested before and after four successive heating/cooling cycles. (red line: before; blue line: after).

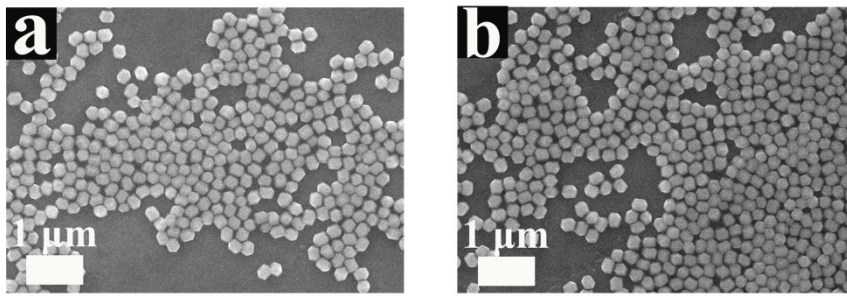

**Fig. S14** SEM images of  $\text{Cs}_4\text{PbBr}_6$  tested before (a) and after (b) four successive heating/cooling cycles.

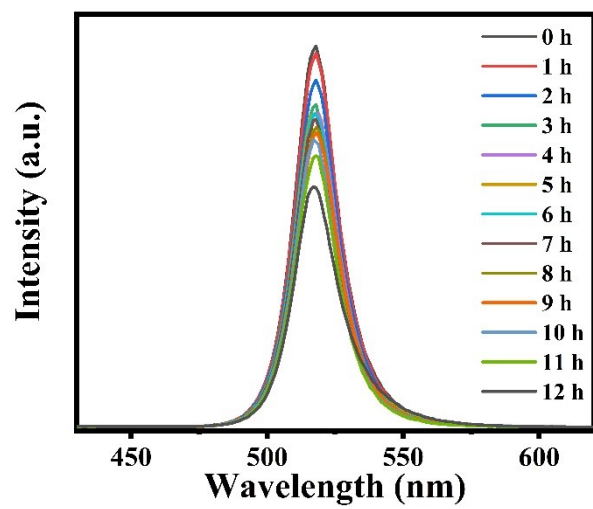

**Fig. S15** PL spectra of Cs<sub>4</sub>PbBr<sub>6</sub> at 373 K at different time points.



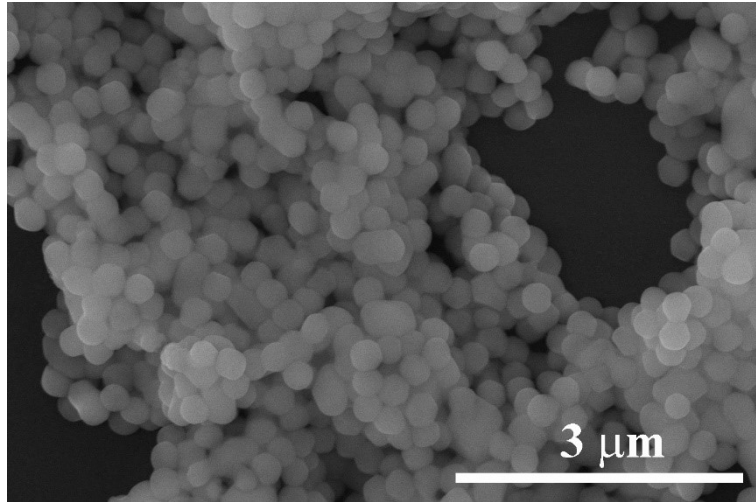

**Fig. S16** SEM image of  $\text{Cs}_4\text{PbBr}_6$  at 373 K for 12 h.

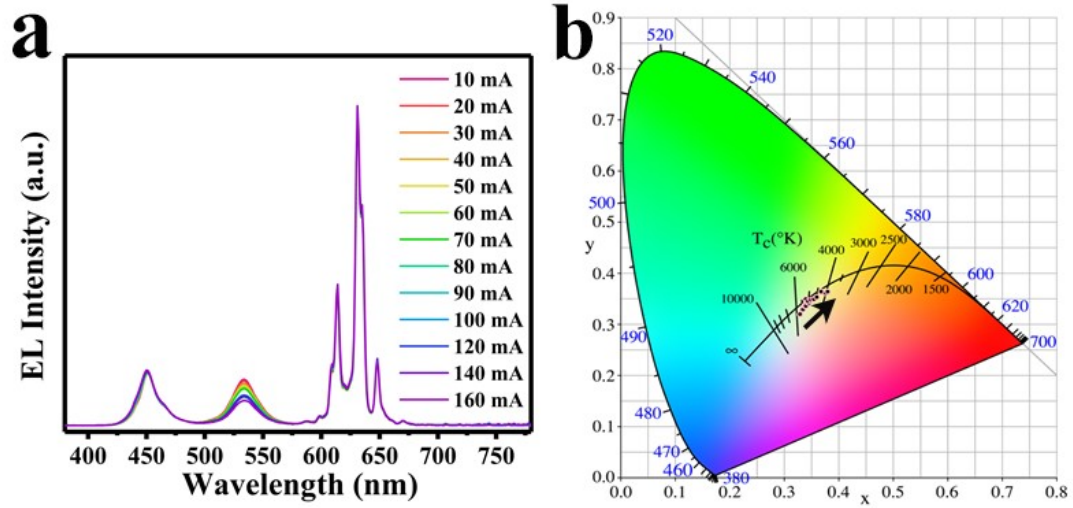

**Fig. S17** (a) Electroluminescence spectra of the WLED device under different drive currents. (b) The corresponding chromaticity coordinates in the CIE diagram.

**Table S1.** Summary of experiment parameters of all samples.

| Sample | Pb-precursor ( $\mu\text{L}$ ) | Cs-oleate ( $\mu\text{L}$ ) | Oleic acid ( $\mu\text{L}$ ) | n-Octylamine ( $\mu\text{L}$ ) |
|--------|--------------------------------|-----------------------------|------------------------------|--------------------------------|
| 2a     | 100                            | 300                         | 600                          | 80                             |
| 2b     | 100                            | 500                         | 600                          | 80                             |
| 2c     | 100                            | 700                         | 600                          | 80                             |
| 2d     | 75                             | 400                         | 600                          | 80                             |
| 2e     | 100                            | 400                         | 600                          | 80                             |
| 2f     | 125                            | 400                         | 600                          | 80                             |
| 3a     | 100                            | 600                         | 600                          | 40                             |
| 3b     | 100                            | 600                         | 600                          | 60                             |
| 3c     | 100                            | 600                         | 600                          | 100                            |
| 3d     | 100                            | 600                         | 400                          | 80                             |
| 3e     | 100                            | 600                         | 600                          | 80                             |
| 3f     | 100                            | 600                         | 800                          | 80                             |
| S5a    | 150                            | 400                         | 600                          | 80                             |
| S5b    | 175                            | 400                         | 600                          | 80                             |
| S7a    | 100                            | 600                         | 600                          | 160                            |
| S7b    | 100                            | 600                         | 200                          | 80                             |
| S8c    | 100                            | 600                         | 1200                         | 80                             |

**Table S2.** The fitted decay time of samples.

| Sample | $A_1$      | $\tau_1$ (ns) | $A_2$      | $\tau_2$ (ns) | $\tau_{ave}$ (ns) |
|--------|------------|---------------|------------|---------------|-------------------|
| 2a     | 4334.29557 | 16.66689      | 880.998    | 132.46012     | 88.2              |
| 2b     | 4792.62205 | 18.97191      | 588.59493  | 179.59139     | 105.3             |
| 2c     | 4418.13883 | 16.24515      | 802.37541  | 90.46198      | 53.6              |
| 2d     | 4884.62209 | 19.32562      | 538.41051  | 210.23156     | 123.4             |
| 2e     | 4214.36458 | 15.72434      | 930.23851  | 120.60113     | 81.7              |
| 2f     | 4416.25981 | 15.25617      | 816.40216  | 107.93178     | 67.8              |
| 3a     | 3793.85214 | 20.70603      | 1123.68365 | 208.50307     | 161.3             |
| 3b     | 4316.24004 | 16.21599      | 884.20554  | 129.06623     | 86.2              |
| 3c     | 4529.14762 | 18.25483      | 834.56421  | 95.24795      | 56.0              |
| 3d     | 4412.86315 | 17.24518      | 842.10624  | 105.23697     | 64.6              |
| 3e     | 4432.10506 | 16.67893      | 874.32549  | 142.16059     | 95.4              |
| 3f     | 4737.46634 | 16.88722      | 653.31589  | 168.77274     | 104.9             |
